# Supplementary material
Source: PubMed Central journal article supplement (PMC5328478)
Supplement: IAI.00771-16_zii999091990s1.pdf [file IAI.00771-16_zii999091990s1.pdf]

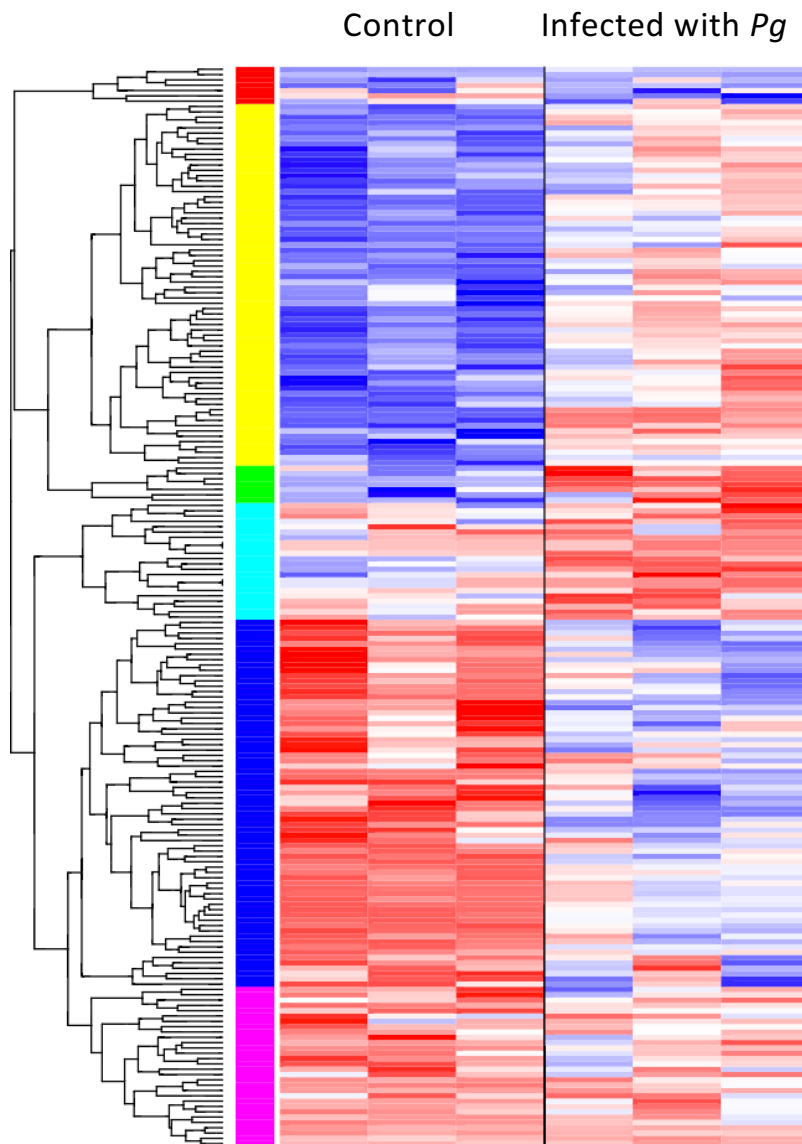

**Figure S1: Heatmap of differentially expressed miRNAs of all of the conditions tested.** Red and blue indicate z-scores of  $\geq 2$  or  $\leq -2$ , respectively, and white indicates a z-score of 0 (row-wise mean),  $p$  and  $q < 0.25$ . Performed in triplicate.

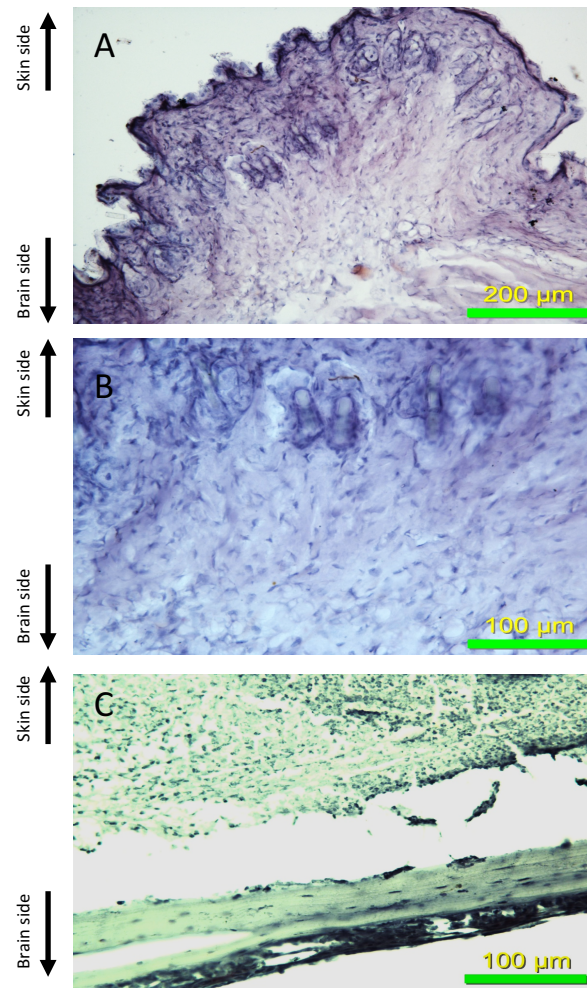

**Figure S2: Histological Sections.** Representative samples for skin (A-B) & underlying calvarial bone (C) at the middle of the calvaria in an uninfected mouse. TRAP staining for bone (bottom row, 200x) and H&E staining for the skin (Top row, 100x; middle row, 200x).

| Pathway                                | Benjamini corrected <i>p</i> -value |
|----------------------------------------|-------------------------------------|
| Chemokine signalling pathway           | 1.3 <sup>E-27</sup>                 |
| Cytokine-cytokine receptor interaction | 2.4 <sup>E-8</sup>                  |
| TNF signalling pathway                 | 1.9 <sup>E-1</sup>                  |

| Pathway                               | Benjamini corrected <i>p</i> -value |
|---------------------------------------|-------------------------------------|
| Osteoclast differentiation            | 5.3 <sup>E-8</sup>                  |
| T cell receptor signalling pathway    | 6.7 <sup>E-7</sup>                  |
| Toll-like receptor signalling pathway | 4.6 <sup>E-6</sup>                  |
| MAPK signalling pathway               | 7.5 <sup>E-6</sup>                  |
| Chemokine signalling pathway          | 2.0 <sup>E-5</sup>                  |

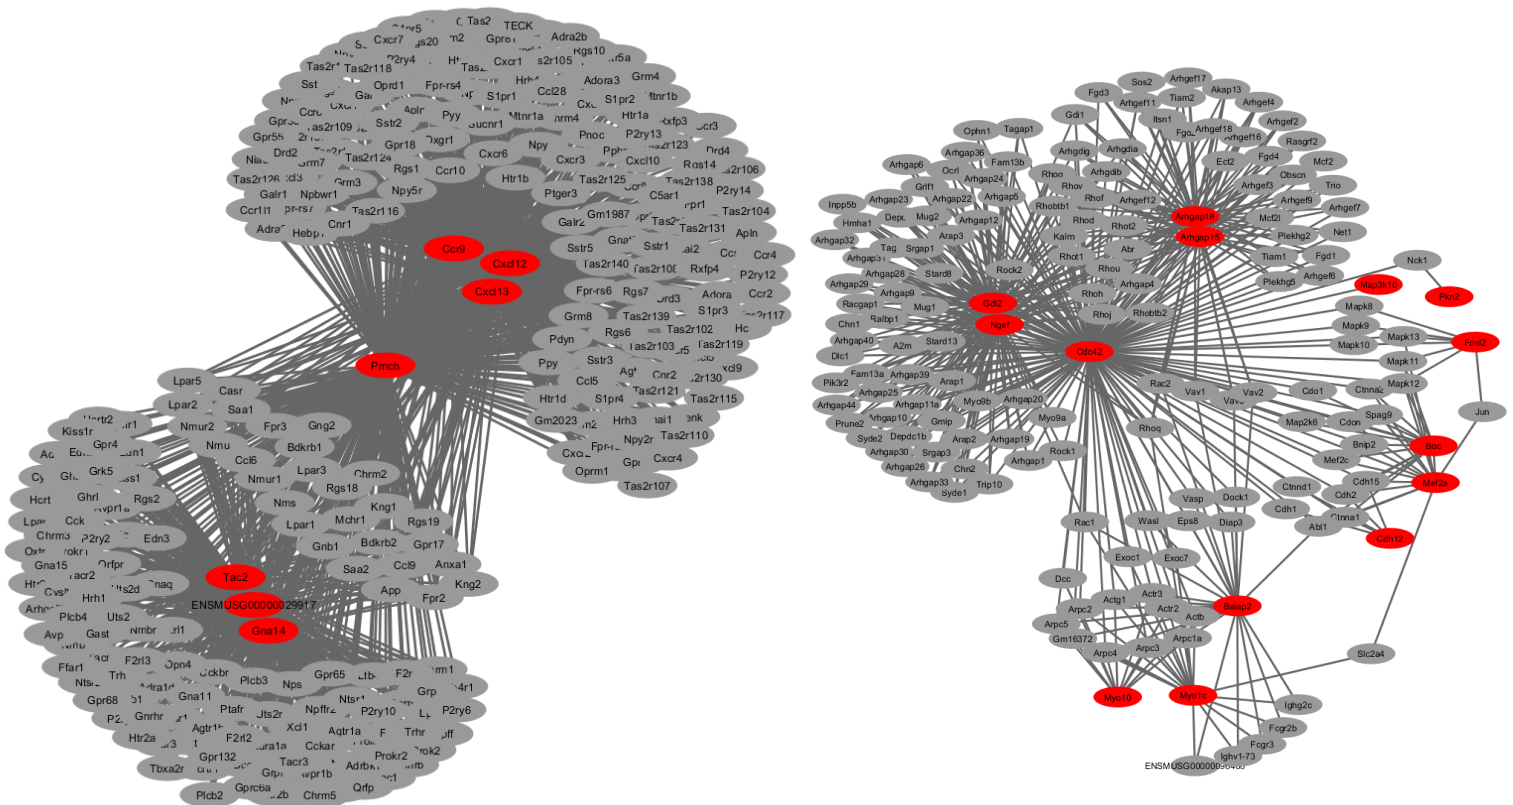

**Figure S3: Representative topological modules related to mmu-miR-155 target genes and identified pathways associated to innate immune response. In red, genes identified as directly affected by mmu-miR-155.**

| Pathway                                | Benjamini corrected <i>p</i> -value |
|----------------------------------------|-------------------------------------|
| T-cell receptor signalling pathway     | 6.6 <sup>E</sup> -12                |
| Osteoclast differentiation             | 2.2 <sup>E</sup> -11                |
| B-cell receptor signalling pathway     | 1.9 <sup>E</sup> -11                |
| Bacterial invasion of epithelial cells | 7.4 <sup>E</sup> -11                |
| Chemokine signalling pathway           | 2.6 <sup>E</sup> -10                |
| Jak-STAT signalling pathway            | 1.1 <sup>E</sup> -8                 |
| NF-kappa B signalling pathway          | 1.4 <sup>E</sup> -5                 |
| Apoptosis                              | 3.0 <sup>E</sup> -5                 |
| PI3-Akt signalling pathway             | 1.0 <sup>E</sup> -4                 |
| Toll-like receptor signalling pathway  | 2.5 <sup>E</sup> -4                 |
| TNF signalling pathway                 | 3.1 <sup>E</sup> -4                 |

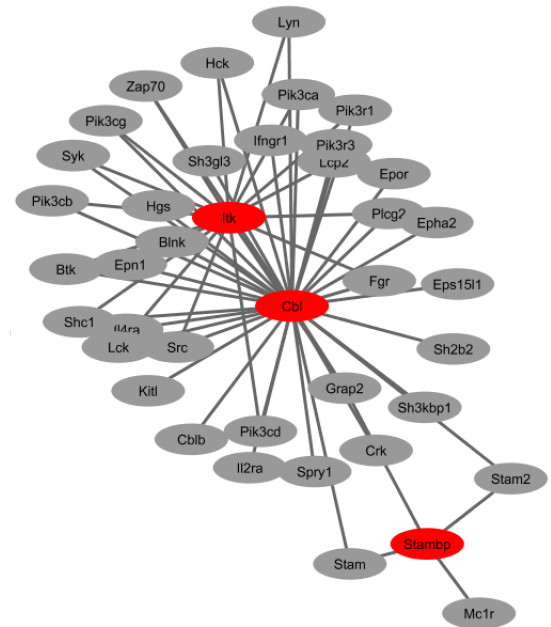

**Figure S4: Topological module related to mmu-miR-155 target genes and identified pathways associated to innate immune response.** In red, genes identified as directly affected by mmu-miR-155.
